# Supplementary material for: Carbon dioxide-boosted growth of high-density and vertically aligned carbon nanotube arrays on a stainless steel mesh
Source: Royal Society of Chemistry journal article supplement (doi:10.1039/d2ra04822a), 2022-01-01
Supplement: d2ra04822a1.pdf [file d2ra04822a1.pdf]

## Supporting information

### **Carbon dioxide-boosted growth of high-density and vertically aligned CNT arrays on a stainless steel mesh**

Jun Jie Cao, Yu Jiang, Hang Zhan, Yu Zhang\*, Jian Nong Wang\*

School of Mechanical and Power Engineering East China University of Science and  
Technology, 130 Meilong Road, Shanghai 200237, China.

\* *Corresponding author. Tel: 86-21-64252360.*

E-mail: [jnwang@ecust.edu.cn](mailto:jnwang@ecust.edu.cn) (*Jian Nong Wang*)

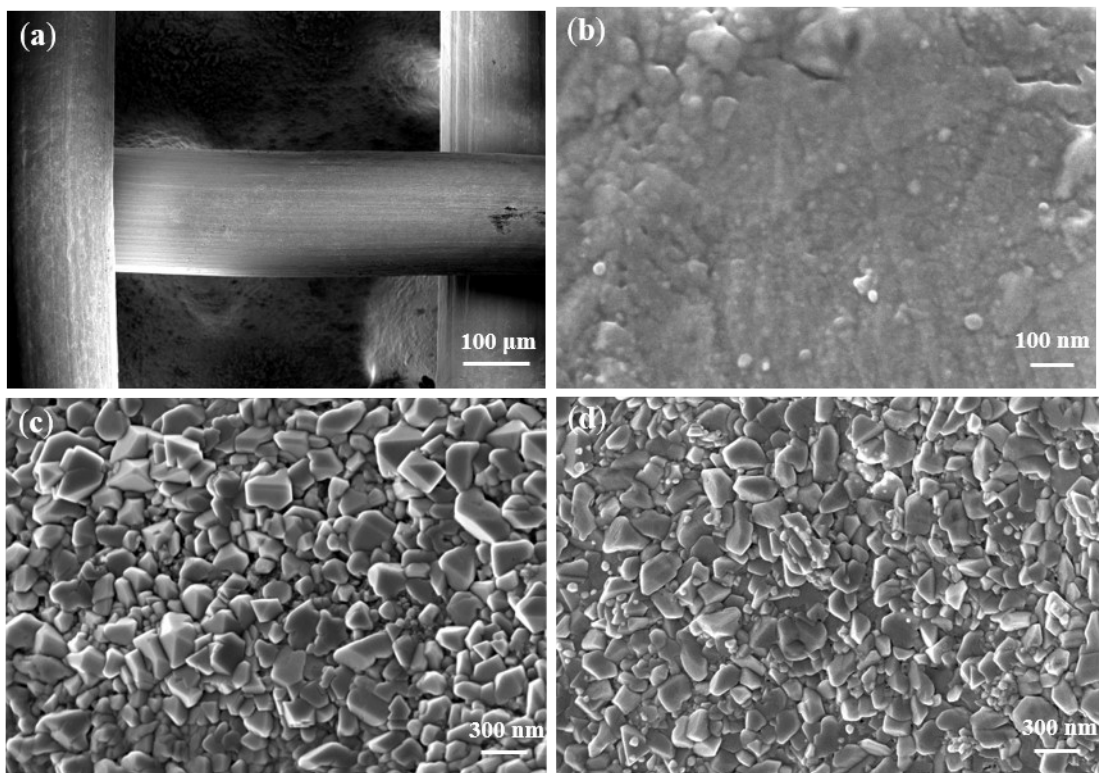

**Fig. S1.** Morphology evolution of the substrate surface. Pristine SS mesh at low (a) and high magnifications (b); (c) As-oxidized SS mesh; (d) Oxidation-reduction treated SS mesh

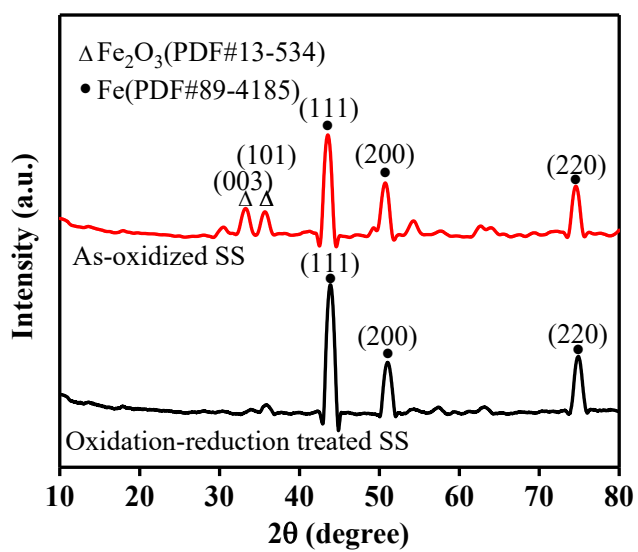

**Fig. S2.** XRD patterns for the as-oxidized SS mesh and oxidation-reduction treated SS

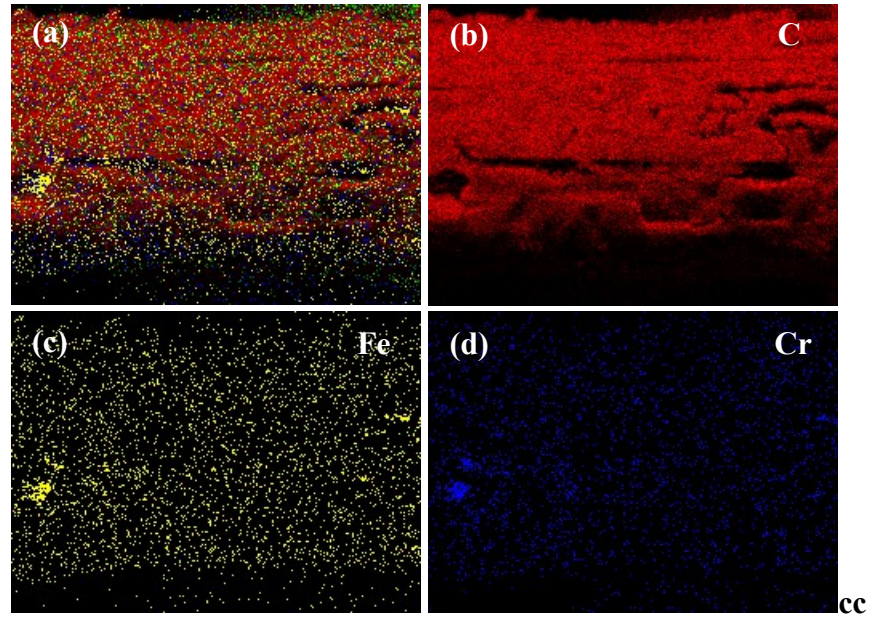

**Fig. S3.** Elemental mapping of VACNTs/SS

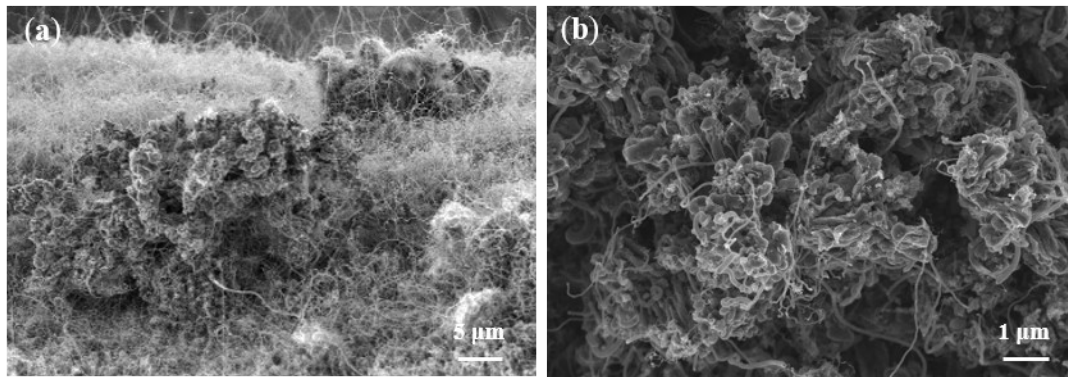

**Fig. S4.** SEM images at different magnifications recorded from the samples when the growth time was increased to 2 h, showing a large number of particles on the surface

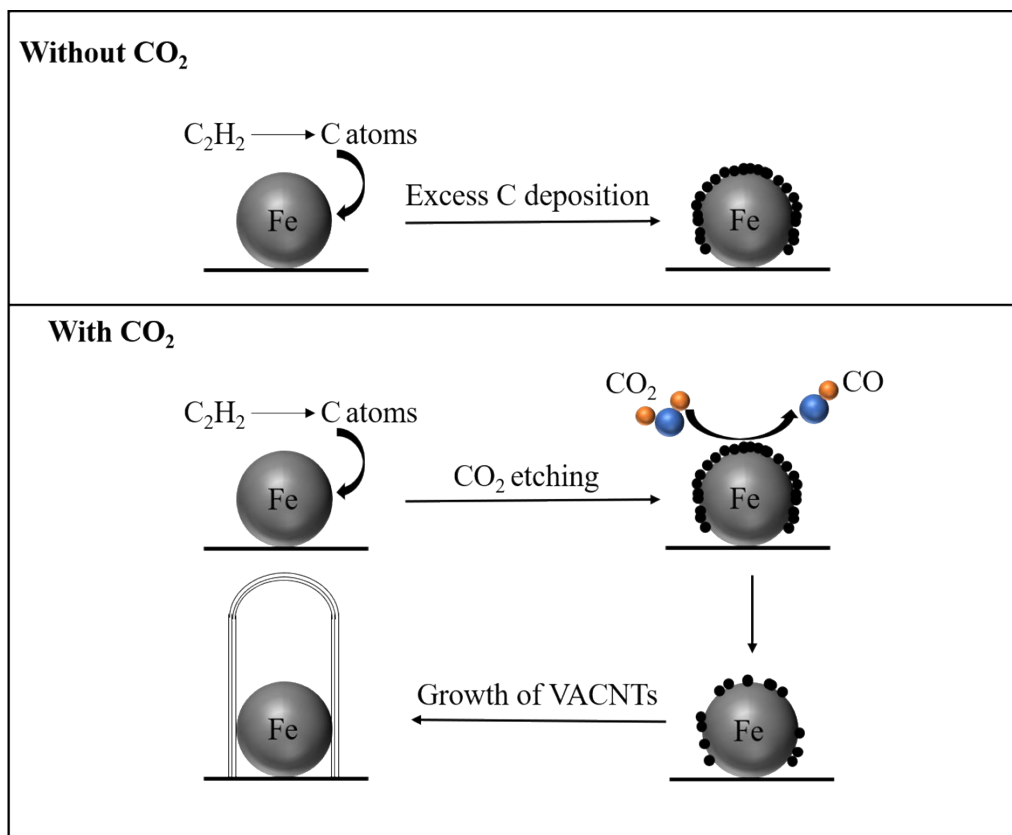

**Fig. S5.** A schematic illustrating the mechanism involved in the presence/absence of CO<sub>2</sub>

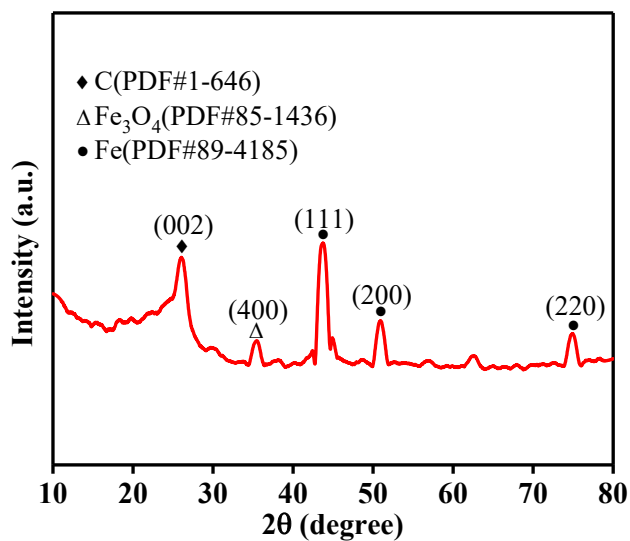

**Fig. S6.** The XRD measurement of VACNTs/SS to characterize the components upon

CO<sub>2</sub> treatment

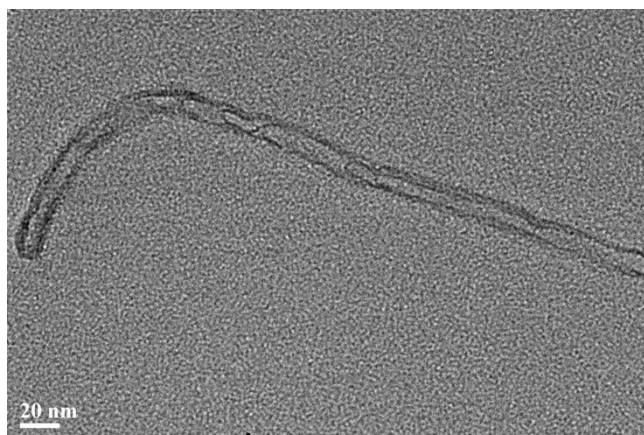

**Fig. S7.** The TEM image recorded from the tip of one typical CNT

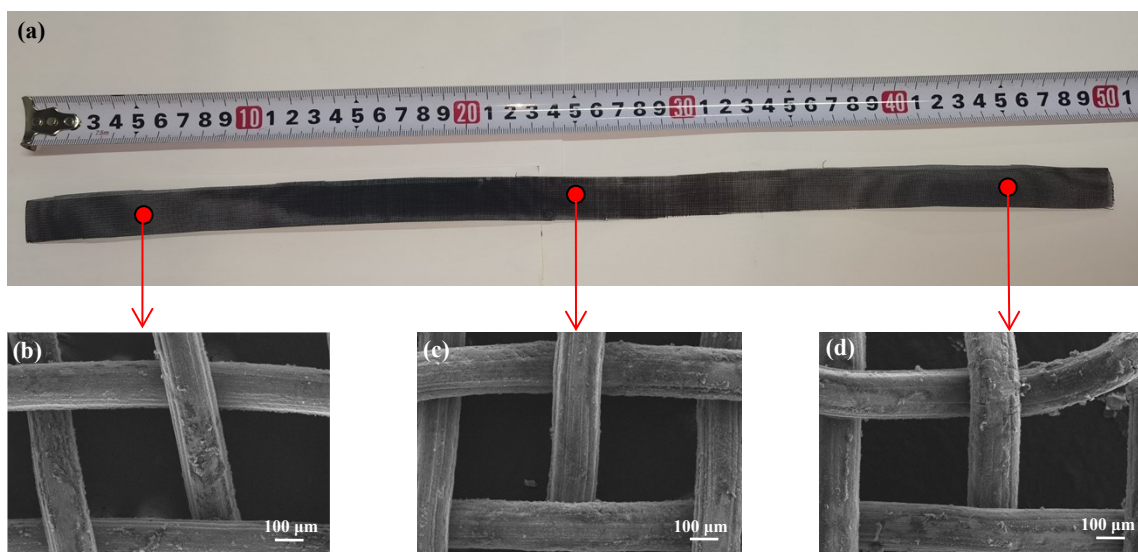

**Fig. S8.** A larger SS mesh (2 cm × 50 cm) as the substrate to grow VACNTs. (a) Optical image; (b-d) SEM images of VACNTs grown at different positions.

**Table S1.** GC results of the exhaust at different flow rates of CO<sub>2</sub>

| Flow rate of CO <sub>2</sub> (sccm) | Residue time (min) | Peak height (mv) | Peak area (mv·s) | Concentration of CO (ppmv) |
|-------------------------------------|--------------------|------------------|------------------|----------------------------|
| 10                                  | 3.44               | 2.929            | 18372.9          | 39.4027                    |
| 30                                  | 3.45               | 6.448            | 39788            | 84.2722                    |
| 50                                  | 3.45               | 16.534           | 109609           | 230.5631                   |

**Table S2.** Comparison of VACNT heights on different conductive substrates

| Substrate | Method                                            | Carbon source                 | Temperature (°C) | Height (μm) | Ref.       |
|-----------|---------------------------------------------------|-------------------------------|------------------|-------------|------------|
| SS 316    | oxidation-reduction with CO <sub>2</sub> addition | C <sub>2</sub> H <sub>2</sub> | 700              | 80          | This study |
| SS 316    | oxidation-reduction                               | C <sub>2</sub> H <sub>4</sub> | 700              | 25          | 1          |
| SS 304    | oxidation-reduction                               | C <sub>2</sub> H <sub>2</sub> | 700              | 15          | 2          |
| SS 304    | etching in HCl (35%)                              | C <sub>2</sub> H <sub>2</sub> | 700              | 31          | 3          |
| SS 304    | etching in HCl (38%)                              | C <sub>2</sub> H <sub>2</sub> | 700              | 40          | 4          |
| SS 304    | PECVD                                             | C <sub>2</sub> H <sub>2</sub> | 800              | 8           | 5          |
| Al        | ultrasonic spray                                  | C <sub>2</sub> H <sub>2</sub> | 620              | 5           | 6          |
| Al        | laser etching                                     | C <sub>2</sub> H <sub>2</sub> | 600              | 10          | 7          |
| W         | sputtering                                        | C <sub>2</sub> H <sub>2</sub> | 625              | 20          | 8          |
| Ti        | sputtering                                        | C <sub>2</sub> H <sub>4</sub> | 700              | 40          | 9          |

## References

- 1 N. Sano, T. Kodama and H. Tamon, *Carbon*, 2013, **55**, 365.
- 2 H. Wang and C. Na, *ACS Appl. Mater. Interfaces*, 2014, **6**, 20309.
- 3 P. Avasthi, A. Kumar and V. Balakrishnan, *ACS Appl. Mater. Interfaces*, 2019, **2**, 1484.
- 4 C. E. Baddour, F. Fadlallah, D. Nasuhoglu, R. Mitra, L. Vandsburger and J.-L. Meunier, Meunier, *Carbon*, 2009, **47**, 313.
- 5 A. Thapa, S. Neupane, R. Guo, K. L. Jungjohann, D. Pete and W. Li, *Diam. Relat. Mater.*, 2018, **90**, 144.
- 6 I. B. Dogru, M. B. Durukan, O. Turel and H. E. Unalan, *Prog. Nat. Sci.*, 2016, **26**, 232.
- 7 S. Huang, X. Du, X. Li, M. Ma and L. Xiong, *Adv. Funct. Mater.*, 2021, **31**, 2104531.
- 8 P. M. Parthangal, R. E. Cavicchi and M. R. Zachariah, *Nanotechnology*, 2007, **18**, 185605.
- 9 A. Szabó, P. Andricević, Z. Pápa, T. Gyulavári, K. Németh, E. Horvath, L. Forró and K. Hernadi, *Front. Chem.*, 2018, **6**, 593.
